# Supplementary material for: One-step controllable synthesis of three-dimensional WO3 hierarchical architectures with different morphologies decorated with silver nanoparticles: enhancing the photocatalytic activity
Source: Royal Society of Chemistry journal article supplement (doi:10.1039/c9ra10173j), 2020-01-01
Supplement: c9ra10173j1.pdf [file c9ra10173j1.pdf]

## Supplementary information

# One-step controllable synthesis of three-dimensional WO<sub>3</sub> hierarchical architectures with different morphologies decorated with silver nanoparticles: enhancing the photocatalytic activity

**R. A. Capeli,<sup>a</sup> C. J. Dalmaschio<sup>b</sup>, S. R. Teixeira,<sup>c</sup> V. R. Mastelaro,<sup>d</sup> A. J.  
Chiquito,<sup>e</sup> E. Longo<sup>f</sup>, F. M. Pontes<sup>a,\*</sup>**

\*Corresponding author, Tel.: +55 14 3103 6135; fax: +55 14 3103 6088

E-mail address: fenelon@fc.unesp.br (Fenelon Pontes)

## Results and Discussion

We are investigating the evolution of  $\text{WO}_3\cdot\text{Ag}$  as function of hydrothermal temperature. The results as function of hydrothermal reaction temperature show an evolution Ag-NPs decorated  $\text{WO}_3$  nanospheres to urchin-like architecture and finally spiky ball-like structure, as presented in FEG image below for  $\text{WO}_3\cdot 0.20\text{Ag}$ . Increasing the temperature promotes the growth and the hierarchical structures were observed in  $\text{WO}_3\cdot\text{Ag}$ .

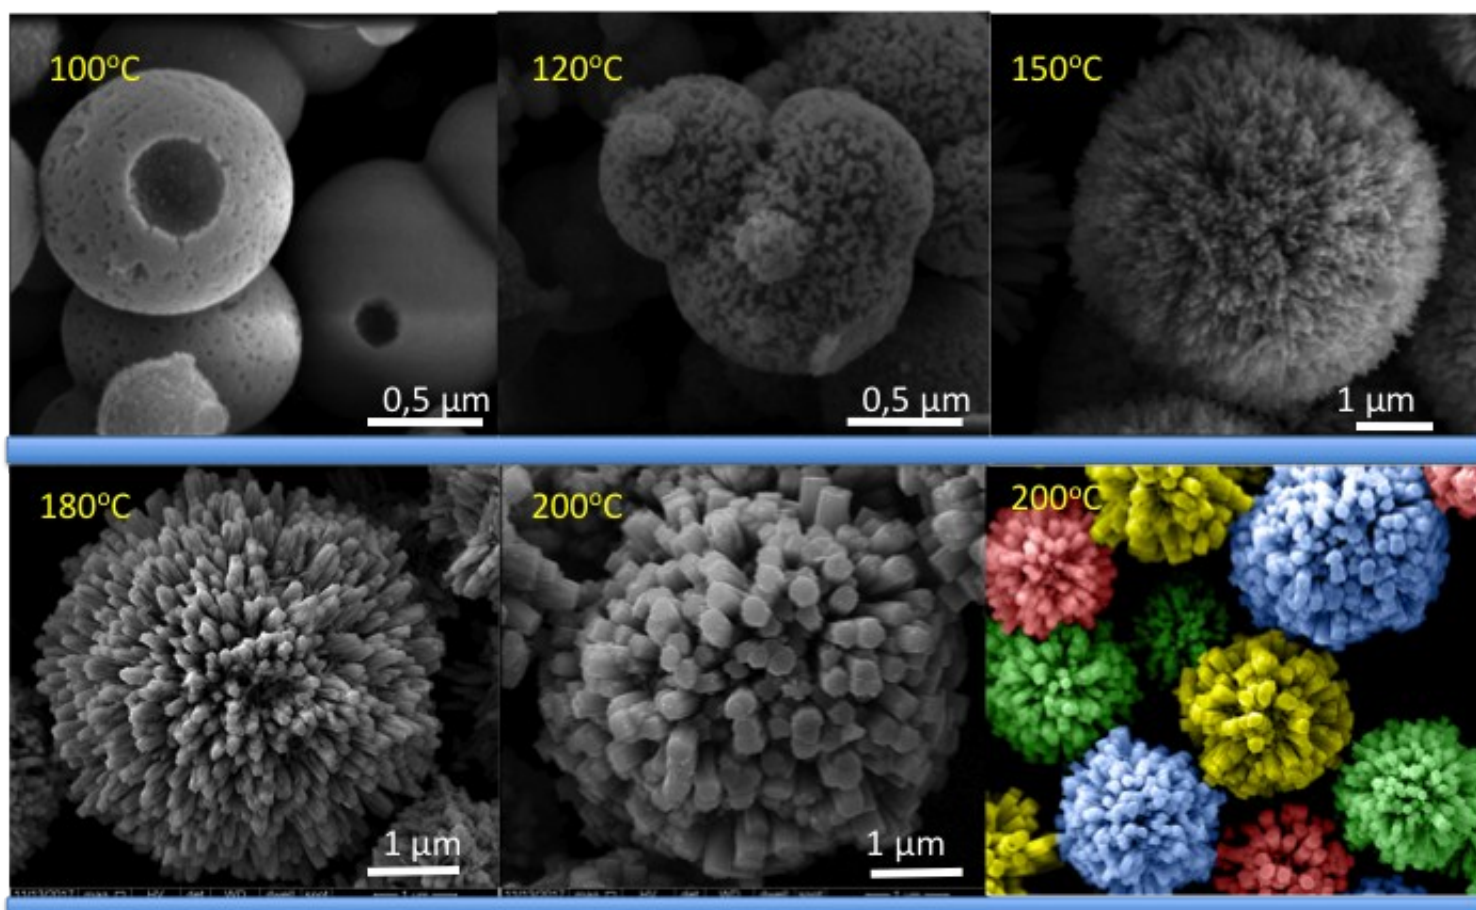

**Fig. S1.** FEGSEM images of sample ( $\text{WO}_3\cdot 0.20\text{Ag}$ ) synthesized by the hydrothermal method at different reaction temperatures for 2 hours. Nanospheres (100°C-120°C), urchin-like structure (150°C-180°C) and spiky ball-like structure (200°C).
